# Supplementary material for: Analysis of the interactome of the Ser/Thr Protein Phosphatase type 1 in Plasmodium falciparum
Source: PubMed Central journal article supplement (PMC4794898; doi:10.1186/s12864-016-2571-z), 2016-03-17
Supplement: 12864_2016_2571_MOESM5_ESM.pdf [file 12864_2016_2571_MOESM5_ESM.pdf]

**A**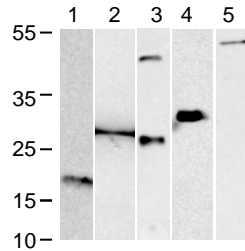

1: PF3D7\_0708400  
 2: PF3D7\_0818900  
 3: PF3D7\_0827900  
 4: PF3D7\_1343000  
 5: PF3D7\_1462800

1: PF3D7\_0220000  
 2: PF3D7\_0520900  
 3: PF3D7\_0718100  
 4: PF3D7\_0720700  
 5: PF3D7\_0816600  
 6: PF3D7\_0917900  
 7: PF3D7\_0919900  
 8: PF3D7\_1008000  
 9: PF3D7\_1031600  
 10: PF3D7\_1130700  
 11: PF3D7\_1202600  
 12: PF3D7\_1205500  
 13: PF3D7\_1227000  
 14: PF3D7\_1229400  
 15: PF3D7\_1303800

**B**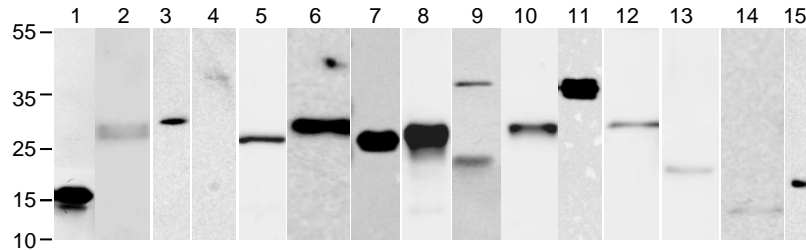

1: PF3D7\_0305500  
 2: PF3D7\_0407300  
 3: PF3D7\_0610100  
 4: PF3D7\_0628100  
 5: PF3D7\_0723800  
 6: PF3D7\_0727500  
 7: PF3D7\_0917500  
 8: PF3D7\_0930100  
 9: PF3D7\_1003700  
 10: PF3D7\_1008100  
 11: PF3D7\_1029400  
 12: PF3D7\_1106800  
 13: PF3D7\_1109100  
 14: PF3D7\_1200100  
 15: PF3D7\_1322100  
 16: PF3D7\_1366300  
 17: PF3D7\_1367500

**C**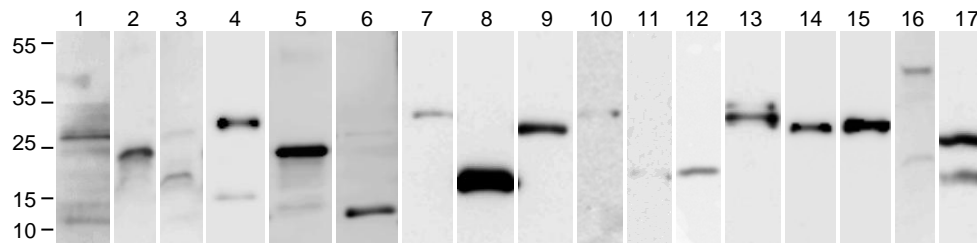

**Figure S1. Production of Pips in *E. coli*.** Purified recombinant proteins were separated by SDS-PAGE and transferred to nitrocellulose membrane. Immunoblot assays were performed using an anti-histidine mAb at 1:2000. **A**, **B** and **C**, represent Pips identified by affinity purification, Y2H screening and *in silico* analysis respectively.
